# Supplementary material for: In situ synthesis of fluorescent polydopamine nanoparticles coupled with enzyme-controlled dissolution of MnO2 nanoflakes for a sensitive immunoassay of cancer biomarkers
Source: Royal Society of Chemistry journal article supplement (doi:10.1039/c7tb02291c), 2017-01-01
Supplement: c7tb02291c1.pdf [file c7tb02291c1.pdf]

## SUPPORTING INFORMATION

### **In situ synthesis of fluorescent polydopamine nanoparticles coupled with enzyme-controlled dissolution of MnO<sub>2</sub> nanoflakes for sensitive immunoassay of cancer biomarkers**

Zhenzhen Lin,<sup>a</sup> Meijin Li,<sup>a,\*</sup> Shuzhen Lv,<sup>a</sup> Kangyao Zhang,<sup>a</sup> Minghua Lu,<sup>b,\*</sup> and Dianping Tang

*<sup>a</sup>Key Laboratory of Analytical Science for Food Safety and Biology (MOE & Fujian Province), Collaborative IState Key Laboratory of Photocatalysis on Energy and Environment, Department of Chemistry, Fuzhou University, Fuzhou 350116, P.R. China; <sup>b</sup>Institute of Environmental and Analytical Science, School of Chemistry and Chemical Engineering, Henan University, Kaifeng 475004, Henan, P.R. China*

#### **\*CORRESPONDING AUTHOR INFORMATION**

Phone: +86-591-2286 6125; fax: +86-591-2286 6135; e-mails: mjli@fzu.edu.cn (M. Li) & minghualu88@yeah.net or mhlh@henu.edu.cn (M. Lu)

## S1. Characterization of $\text{AO}_\text{X}$ -AuNP- $\text{Ab}_2$

Fig. S1-A gives typical TEM image of the newly prepared gold nanoparticles, which exhibited spherical morphology with a mean lateral dimension of approximately 16 nm. UV-vis absorption spectrum was also used to characterize the successful formation of  $\text{AO}_\text{X}$ -AuNP- $\text{Ab}_2$  conjugates. As seen from curve 'a' in Fig. S1-B, pure gold colloids presented a characteristic absorption peak at 518 nm. The characteristic plasmon absorption peak shifted from 518 to 522 nm after polyclonal anti-AFP antibody and  $\text{AO}_\text{X}$  were labeled onto the nanoparticles (curve 'b') due to the change in the surface charge of gold nanoparticles. The results revealed the successful formation of bioconjugates.

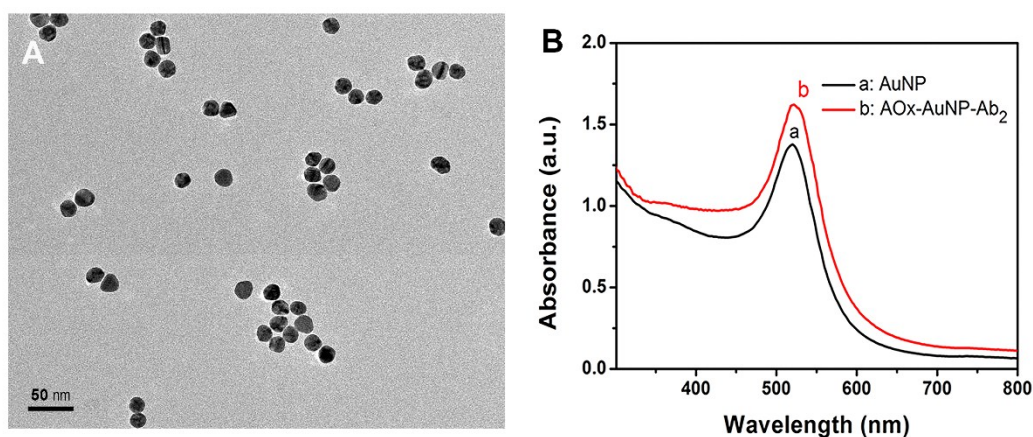

**Fig. S1.** (A) TEM image of gold colloids and (B) UV-vis adsorption spectra of (a) AuNP, (b)  $\text{AO}_\text{X}$ -AuNP- $\text{Ab}_2$ .
